# Supplementary material
Source: PubMed Central journal article supplement (PMC4191815)
Supplement: pnas.201416079SI.pdf [file pnas.201416079SI.pdf]

# Supporting Information

Thayer et al. 10.1073/pnas.1416079111

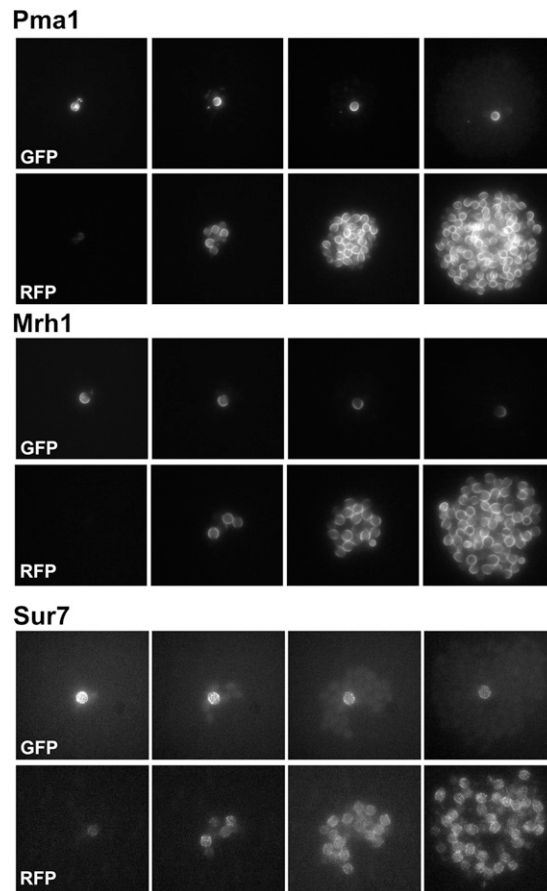

**Fig. S1.** PMA1, MRH1, and SUR7 recombination-induced tag exchange (RITE)-tag time-lapse images with separated channels. Images from Fig. 2B presented with GFP and RFP channels as separate grayscale images. PMA1-RITE (*Top*), MRH1-RITE (*Middle*), and SUR7-RITE (*Bottom*). (Magnification: Pma1, 200x; Mrh1 and Sur7, 250x.)





**Table S1. Plasmids and strains used**

| Plasmid or strain | Genotype or descriptions                                                                                                                                                                                                                                                                                                                             | Source                                                              |
|-------------------|------------------------------------------------------------------------------------------------------------------------------------------------------------------------------------------------------------------------------------------------------------------------------------------------------------------------------------------------------|---------------------------------------------------------------------|
| Plasmids          |                                                                                                                                                                                                                                                                                                                                                      |                                                                     |
| pKV015            | V5-loxP-HA-GFP-HphMX-loxP-T7-mRFP used to fuse RITE tag to gene of interest                                                                                                                                                                                                                                                                          | (1)                                                                 |
| pSS146            | pINT-URA3-P <sub>GPD/IDH3</sub> -cre-EBD78, Mlul linearized fragment used to integrate cre-EBD78 into CYC1 <sub>term</sub> locus                                                                                                                                                                                                                     | (1)                                                                 |
| pKT127            | pFA6a-link-yEGFP-KanMX used to fuse GFP to gene of interest                                                                                                                                                                                                                                                                                          | (2)                                                                 |
| pKT128            | pFA6a-link-yEGFP-SpHIS5 used to fuse GFP to gene of interest                                                                                                                                                                                                                                                                                         | (2)                                                                 |
| pKTmCherry        | mCherry-KanMX used to fuse mCherry to gene of interest                                                                                                                                                                                                                                                                                               | W. Shou laboratory, Fred Hutchinson Cancer Research Center, Seattle |
| Yeast strains     |                                                                                                                                                                                                                                                                                                                                                      |                                                                     |
| BY4741            | MATa his3Δ1 leu2Δ0 met15Δ0 ura3Δ0                                                                                                                                                                                                                                                                                                                    | (3)                                                                 |
| BY4742            | MATα his3Δ1 leu2Δ0 lys2Δ0 ura3Δ0                                                                                                                                                                                                                                                                                                                     | (3)                                                                 |
| UCC4044           | MATa/α his3Δ1/his3Δ1 leu2Δ0/leu2Δ0 ura3Δ0/ura3Δ0 met15Δ0/+ lys2Δ0/+ LAP4-V5-loxP-HA-GFP-HphMX-loxP-T7-mRFP/LAP4 CYC1 <sub>term</sub> :URA3-P <sub>GPD/IDH3</sub> -cre-EBD78:CYC1 <sub>term</sub> /+                                                                                                                                                  | Present study                                                       |
| UCC4181           | MATa/α his3Δ1/his3Δ1 leu2Δ0/leu2Δ0 ura3Δ0/ura3Δ0 met15Δ0/+ lys2Δ0/+ MRH1-V5-loxP-HA-GFP-HphMX-loxP-T7-mRFP/IMRH1 CYC1 <sub>term</sub> :URA3-P <sub>GPD/IDH3</sub> -cre-EBD78:CYC1 <sub>term</sub> /+                                                                                                                                                 | Present study                                                       |
| UCC4190           | MATa/α his3Δ1/his3Δ1 leu2Δ0/leu2Δ0 ura3Δ0/ura3Δ0 met15Δ0/+ lys2Δ0/+ w/ PMA1-V5-loxP-HA-GFP-HphMX-loxP-T7-mRFP/PMA1 CYC1 <sub>term</sub> :URA3-P <sub>GPD/IDH3</sub> -cre-EBD78:CYC1 <sub>term</sub> /+                                                                                                                                               | Present study                                                       |
| UCC4243           | MATa/α his3Δ1/his3Δ1 leu2Δ0/leu2Δ0 ura3Δ0/ura3Δ0 met15Δ0/+ lys2Δ0/+ MET6-V5-loxP-HA-GFP-HphMX-loxP-T7-mRFP/MET6 CYC1 <sub>term</sub> :URA3-P <sub>GPD/IDH3</sub> -cre-EBD78:CYC1 <sub>term</sub> /+                                                                                                                                                  | Present study                                                       |
| UCC4277           | MATa/α his3Δ1/his3Δ1 leu2Δ0/leu2Δ0 ura3Δ0/ura3Δ0 met15Δ0/+ lys2Δ0/+ YNL134C-V5-loxP-HA-GFP-HphMX-loxP-T7-mRFP/YNL134C CYC1 <sub>term</sub> :URA3-P <sub>GPD/IDH3</sub> -cre-EBD78:CYC1 <sub>term</sub> /+                                                                                                                                            | Present study                                                       |
| UCC4395           | MATa/α his3Δ1/his3Δ1 leu2Δ0/leu2Δ0 ura3Δ0/ura3Δ0 lys2Δ0/+ trp1Δ63/+ hoΔ::P <sub>SCW11</sub> -cre-EBD78-NatMX/hoΔ::P <sub>SCW11</sub> -cre-EBD78-NatMX loxP-CDC20-Intron-loxP-HphMX/loxP-CDC20-Intron-loxP-HphMX loxP-UBC9-loxP-LEU2/loxP-UBC9-loxP-LEU2 LSP1-mCherry-KanMX/LSP1-mCherry-KanMX SUR7-GFP-SpHIS5/SUR7-GFP-SpHIS5                        | Present study                                                       |
| UCC4925           | MATa/α his3Δ1/his3Δ1 leu2Δ0/leu2Δ0 ura3Δ0/ura3Δ0 lys2Δ0/+ trp1Δ63/+ hoΔ::SCW11pr-cre-EBD78-NatMX/hoΔ::P <sub>SCW11</sub> -cre-EBD78-NatMX loxP-CDC20-Intron-loxP-HphMX/loxP-CDC20-Intron-loxP-HphMX loxP-UBC9-loxP-LEU2/loxP-UBC9-loxP-LEU2                                                                                                          | (4)                                                                 |
| UCC5406           | MATa/α ade2Δ::hisGlade2Δ::hisG his3Δ1/his3Δ1 leu2Δ0/leu2Δ0 met15Δ0::ADE2/+ ura3Δ0/ura3Δ0 trp1Δ63/trpΔ63 hoΔ::P <sub>SCW11</sub> -cre-EBD78-NatMX/hoΔ::P <sub>SCW11</sub> -cre-EBD78-NatMX loxP-UBC9-loxP-LEU2/loxP-UBC9-loxP-LEU2 loxP-CDC20-Intron-loxP-HphMX/loxP-CDC20-Intron-loxP-HphMX arg4Δ0::KanMX/larg4Δ0::KanMX lys1Δ0::KanMX/lys1Δ0::KanMX | Present study                                                       |
| UCC6884           | MATa his3Δ1 leu2Δ0 met15Δ0 ura3Δ0 CYC1 <sub>term</sub> :URA3-P <sub>GPD/IDH3</sub> -cre-EBD78:CYC1 <sub>term</sub>                                                                                                                                                                                                                                   | Present study                                                       |
| UCC6886           | MATα his3Δ1 leu2Δ0 lys2Δ0 ura3Δ0 CYC1 <sub>term</sub> :URA3-P <sub>GPD/IDH3</sub> -cre-EBD78:CYC1 <sub>term</sub>                                                                                                                                                                                                                                    | Present study                                                       |
| UCC8773           | MATa his3Δ1 leu2Δ0 ura3Δ0 lys2Δ0 hoΔ::P <sub>SCW11</sub> -cre-EBD78-NatMX loxP-CDC20-Intron-loxP-HphMX loxP-UBC9-loxP-LEU2                                                                                                                                                                                                                           | (4)                                                                 |
| UCC8774           | MATα his3D1 leu2D0 ura3D0 trp1D63 hoΔ::P <sub>SCW11</sub> -cre-EBD78-NatMX loxP-CDC20-Intron-loxP-HphMX loxP-UBC9-loxP-LEU2                                                                                                                                                                                                                          | (4)                                                                 |
| UCC10141          | MATa/α his3Δ1/his3Δ1 leu2Δ0/leu2Δ0 ura3Δ0/ura3Δ0 lys2Δ0/+ trp1Δ63/+ hoΔ::P <sub>SCW11</sub> -cre-EBD78-NatMX/hoΔ::P <sub>SCW11</sub> -cre-EBD78-NatMX loxP-CDC20-Intron-loxP-HphMX/loxP-CDC20-Intron-loxP-HphMX loxP-UBC9-loxP-LEU2/loxP-UBC9-loxP-LEU2 MRH1-GFP-KanMX/IMRH1-GFP-KanMX                                                               | Present study                                                       |
| UCC11298          | MATa/α his3Δ1/his3Δ1 leu2Δ0/leu2Δ0 ura3Δ0/ura3Δ0 lys2Δ0/+ trp1Δ63/+ hoΔ::P <sub>SCW11</sub> -cre-EBD78-NatMX/hoΔ::P <sub>SCW11</sub> -cre-EBD78-NatMX loxP-CDC20-Intron-loxP-HphMX/loxP-CDC20-Intron-loxP-HphMX loxP-UBC9-loxP-LEU2/loxP-UBC9-loxP-LEU2 SUR7-GFP-SpHIS5/SUR7                                                                         | Present study                                                       |
| UCC12510          | MATa/α his3Δ1/his3Δ1 leu2Δ0/leu2Δ0 ura3Δ0/ura3Δ0 met15Δ0/+ lys2Δ0/+ HSP26-V5-loxP-HA-GFP-HphMX-loxP-T7-mRFP/HSP26 CYC1 <sub>term</sub> :URA3-P <sub>GPD/IDH3</sub> -cre-EBD78:CYC1 <sub>term</sub> /+                                                                                                                                                | Present study                                                       |
| UCC12520          | MATa/α his3Δ1/his3Δ1 leu2Δ0/leu2Δ0 ura3Δ0/ura3Δ0 met15Δ0/+ lys2Δ0/+ THR1-V5-loxP-HA-GFP-HphMX-loxP-T7-mRFP/THR1 CYC1 <sub>term</sub> :URA3-P <sub>GPD/IDH3</sub> -cre-EBD78:CYC1 <sub>term</sub> /+                                                                                                                                                  | Present study                                                       |
| UCC12526          | MATa/α his3Δ1/his3Δ1 leu2Δ0/leu2Δ0 ura3Δ0/ura3Δ0 met15Δ0/+ lys2Δ0/+ SAM2-V5-loxP-HA-GFP-HphMX-loxP-T7-mRFP/SAM2 CYC1 <sub>term</sub> :URA3-P <sub>GPD/IDH3</sub> -cre-EBD78:CYC1 <sub>term</sub> /+                                                                                                                                                  | Present study                                                       |
| UCC12543          | MATa/α his3Δ1/his3Δ1 leu2Δ0/leu2Δ0 ura3Δ0/ura3Δ0 met15Δ0/+ lys2Δ0/+ NCE102-V5-loxP-HA-GFP-HphMX-loxP-T7-mRFP/NCE102 CYC1 <sub>term</sub> :URA3-P <sub>GPD/IDH3</sub> -cre-EBD78:CYC1 <sub>term</sub> /+                                                                                                                                              | Present study                                                       |
| UCC12561          | MATa/α his3Δ1/his3Δ1 leu2Δ0/leu2Δ0 ura3Δ0/ura3Δ0 met15Δ0/+ lys2Δ0/+ GCV3-V5-loxP-HA-GFP-HphMX-loxP-T7-mRFP/GCV3 CYC1 <sub>term</sub> :URA3-P <sub>GPD/IDH3</sub> -cre-EBD78:CYC1 <sub>term</sub> /+                                                                                                                                                  | Present study                                                       |
| UCC12592          | MATa/α his3Δ1/his3Δ1 leu2Δ0/leu2Δ0 ura3Δ0/ura3Δ0 lys2Δ0/+ trp1Δ63/+ hoΔ::P <sub>SCW11</sub> -cre-EBD78-NatMX/hoΔ::P <sub>SCW11</sub> -cre-EBD78-NatMX loxP-CDC20-Intron-loxP-HphMX/loxP-CDC20-Intron-loxP-HphMX loxP-UBC9-loxP-LEU2/loxP-UBC9-loxP-LEU2 HSP26-mCherry-KanMX/HSP26 HSP104-GFP-SpHIS5/HSP104                                           | Present study                                                       |



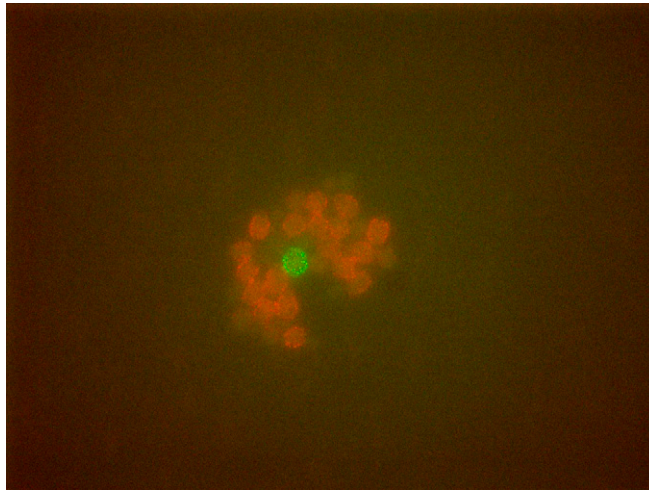

**Movie S3.** Sur7-RITE time-lapse. Sur7 is retained in mother cells at the plasma membrane. (Magnification: 500 $\times$ .)

[Movie S3](#)

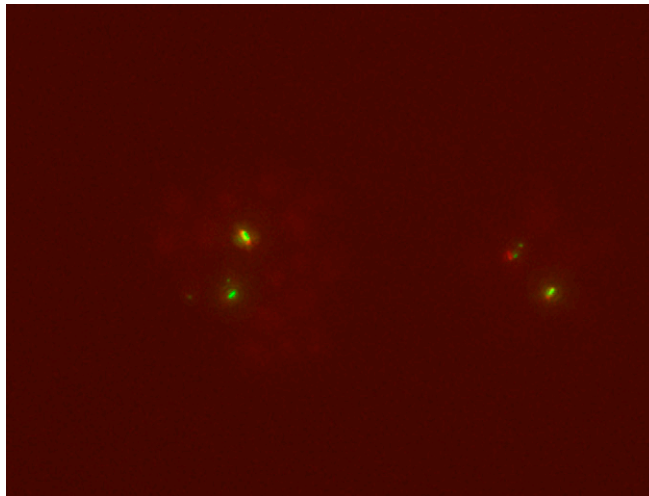

**Movie S4.** Thr1-RITE time-lapse. Thr1 foci have a propensity to remain in mother cells. (Magnification: 1,000 $\times$ .)

[Movie S4](#)

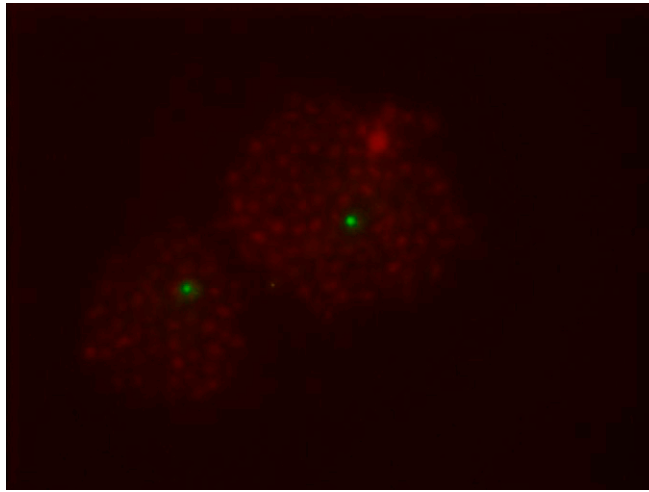

**Movie S5.** Hsp26-RITE time-lapse. Hsp26 foci have a propensity to remain in mother cells. (Magnification: 600x.)

[Movie S5](#)

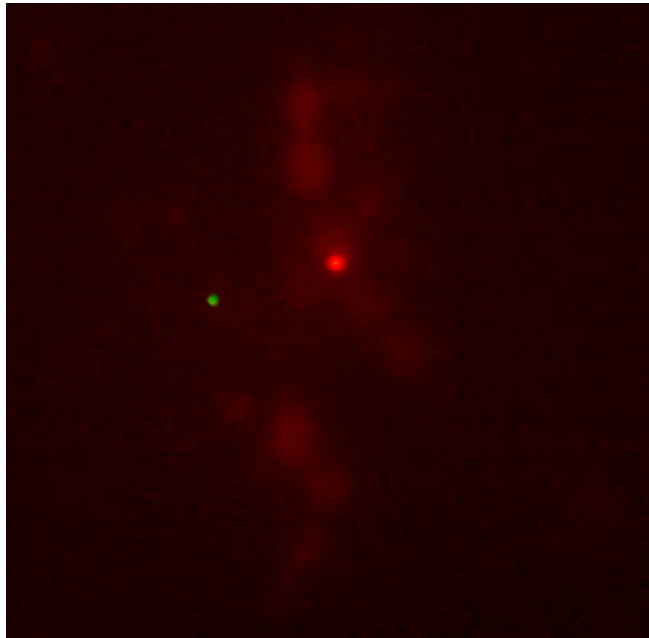

**Movie S6.** Hsp26-RITE time-lapse. Hsp26 foci are sometimes transferred to daughter cells. (Magnification: 1,000x.)

[Movie S6](#)

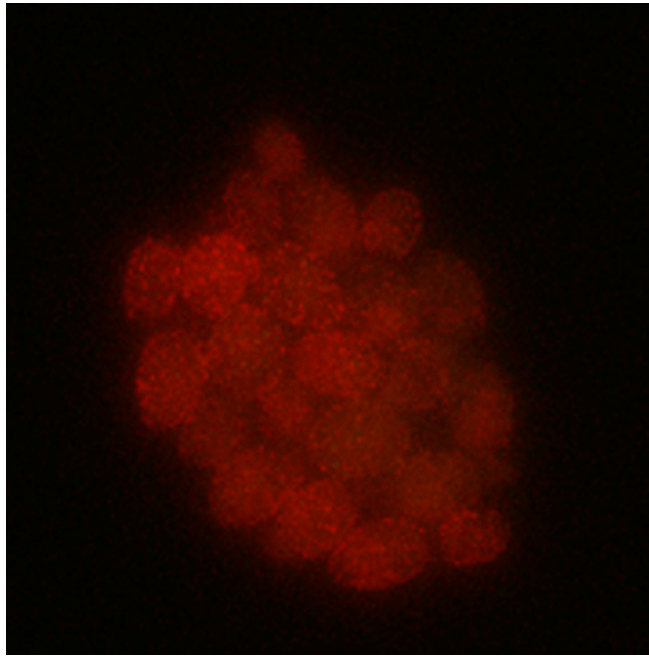

**Movie S7.** Lsp1-RITE time-lapse. Lsp1 is not retained in mother cells. (Magnification: 2,750 $\times$ .)

[Movie S7](#)

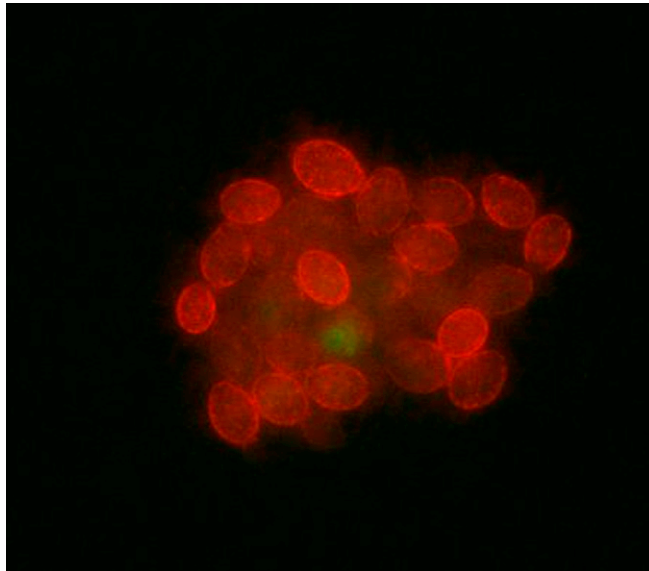

**Movie S8.** Nce102-RITE time-lapse. Nce102 is not retained in mother cells. (Magnification: 2,500 $\times$ .)

[Movie S8](#)



## Dataset S1. Peptides observed with calculated ratio columns

### [Dataset S1](#)

(i) Systematic gene name. (ii) Common gene name. (iii) Approximate molecular weight of source fragment (gel slice). (iv) Peptide sequence. (v) Median  $^{13}\text{C}/^{12}\text{C}$  ratio for all observed events of this peptide from the gel slice. (vi) Species of all peptides specifically identified, heavy or light. (vii) SD of the medians calculated from 1,000 bootstrapped samples of events for this peptide.

## Dataset S2. Plots of the $^{13}\text{C}/^{12}\text{C}$ ratio for peptides in given gel slices that correspond to all proteins that met threshold of having high quality data with ratio $>0.1$

### [Dataset S2](#)

Each page represents a single predicted yeast ORF with its standard and systematic *S. cerevisiae* name in the title. The x axis is approximate molecular weight (MW) of peptide (estimated from gel slice); y axis is median ratio  $^{13}\text{C}/^{12}\text{C}$  for all peptides mapped to that protein in a gel slice; size of dots reflect relative abundance of peptides in that slice; error bars are SD of the medians calculated from 1,000 bootstrapped samples. The expected MW of the full-length unmodified protein is plotted as a vertical dashed red line.

## Dataset S3. Plots of the $^{13}\text{C}/^{12}\text{C}$ ratio for peptides in given gel slices that correspond to all proteins observed

### [Dataset S3](#)

Plots, as described for [Dataset S2](#), for all observed proteins, irrespective of passing filtering criteria described in *Materials and Methods*. Some contaminating human proteins were left as light-labeled controls in the dataset; they are named by their International Protein Index accession number.
